# Supplementary material for: Effect of Remote Glucose Monitoring Utilizing Computerized Insulin Dose Adjustment Algorithms: A Pilot Project
Source: Springer Nature journal article supplement (doi:10.1007/s13300-019-0565-y), 2019-02-05
Supplement: MOESM1 [file 16444270]

**Patient Info**

|                    |                                  |               |                               |                            |                      |                                |
|--------------------|----------------------------------|---------------|-------------------------------|----------------------------|----------------------|--------------------------------|
| <b>First Name</b>  | Patient: 7                       | <b>Height</b> | 5 <input type="text"/> ft.    | 2 <input type="text"/> in. | <b>Gender</b>        | Female <input type="text"/>    |
| <b>Middle Name</b> |                                  | <b>Weight</b> | 183 <input type="text"/> lbs. |                            | <b>Date of Birth</b> | 5/14/1960 <input type="text"/> |
| <b>Last Name</b>   | ce8bbafe6ae04df1a7104b072c7767ee | <b>BMI</b>    | 33.5 <input type="text"/>     |                            |                      |                                |
| <b>Patient ID</b>  |                                  | <b>HbA1c</b>  | 0.0 <input type="text"/>      | %                          |                      |                                |

**Insulin Dosage and Injections**

|                   | <u>Before Breakfast</u>       | <u>Before Lunch</u>           | <u>Before Dinner</u>          | <u>Before Bedtime</u>         |
|-------------------|-------------------------------|-------------------------------|-------------------------------|-------------------------------|
| Levemir (Levemir) | 0 <input type="text"/> units  | 0 <input type="text"/> units  | 0 <input type="text"/> units  | 97 <input type="text"/> units |
| Aspart (Novolog)  | 34 <input type="text"/> units | 38 <input type="text"/> units | 38 <input type="text"/> units | 0 <input type="text"/> units  |

**Meal Times and Glucose Targets (mg/dL)**

|                    | <u>Eat Breakfast</u>         |                              | <u>Eat Lunch</u>              |                              | <u>Eat Dinner</u>            |                              | <u>Bedtime</u>                |                               |
|--------------------|------------------------------|------------------------------|-------------------------------|------------------------------|------------------------------|------------------------------|-------------------------------|-------------------------------|
| <b>Start / End</b> | 6:00 AM <input type="text"/> | 8:00 AM <input type="text"/> | 11:30 AM <input type="text"/> | 1:30 PM <input type="text"/> | 6:00 PM <input type="text"/> | 8:00 PM <input type="text"/> | 10:00 PM <input type="text"/> | 12:00 AM <input type="text"/> |
|                    | Low                          | High                         | Low                           | High                         | Low                          | High                         | Low                           | High                          |
| <b>Before</b>      | 70 <input type="text"/>      | 130 <input type="text"/>     | 70 <input type="text"/>       | 130 <input type="text"/>     | 70 <input type="text"/>      | 130 <input type="text"/>     | 80 <input type="text"/>       | 130 <input type="text"/>      |
| <b>After</b>       | 100 <input type="text"/>     | 160 <input type="text"/>     | 100 <input type="text"/>      | 160 <input type="text"/>     | 100 <input type="text"/>     | 160 <input type="text"/>     |                               |                               |

**Recommendation**

**Before Breakfast:** Increase Aspart (Novolog) By 4 Units From 34 Units To 38 Units  
**Before Lunch:** Continue 38 Units of Aspart (Novolog)  
**Before Dinner:** Increase Aspart (Novolog) By 4 Units From 38 Units To 42 Units  
**Before Bedtime:** Continue 97 Units of Detemir (Levemir)

**Warnings**

There are too few readings overnight to analyze and make a recommendation.  
 There are too few readings during the afternoon to analyze and make a recommendation.  
 Readings from previous report in use since last report generated no actionable recommendations.

Data Analysis

10/04/2017 to 10/25/2017 (22 days)

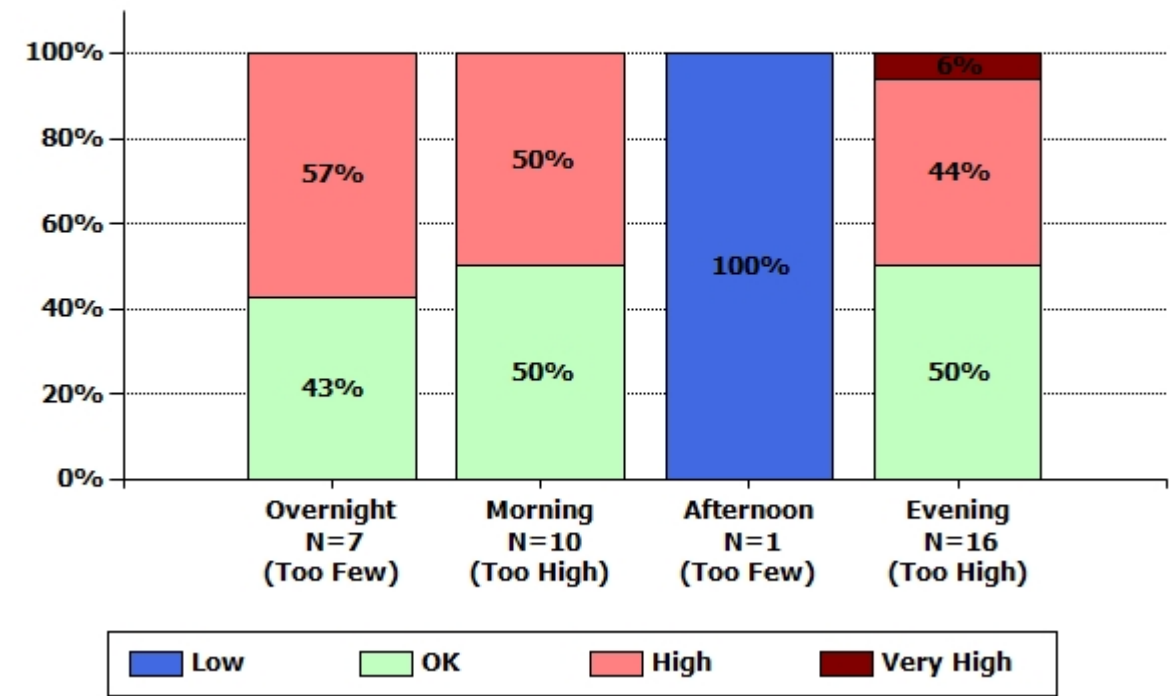

Raw Glucometer Readings

10/04/2017 to 10/25/2017 (22 days)

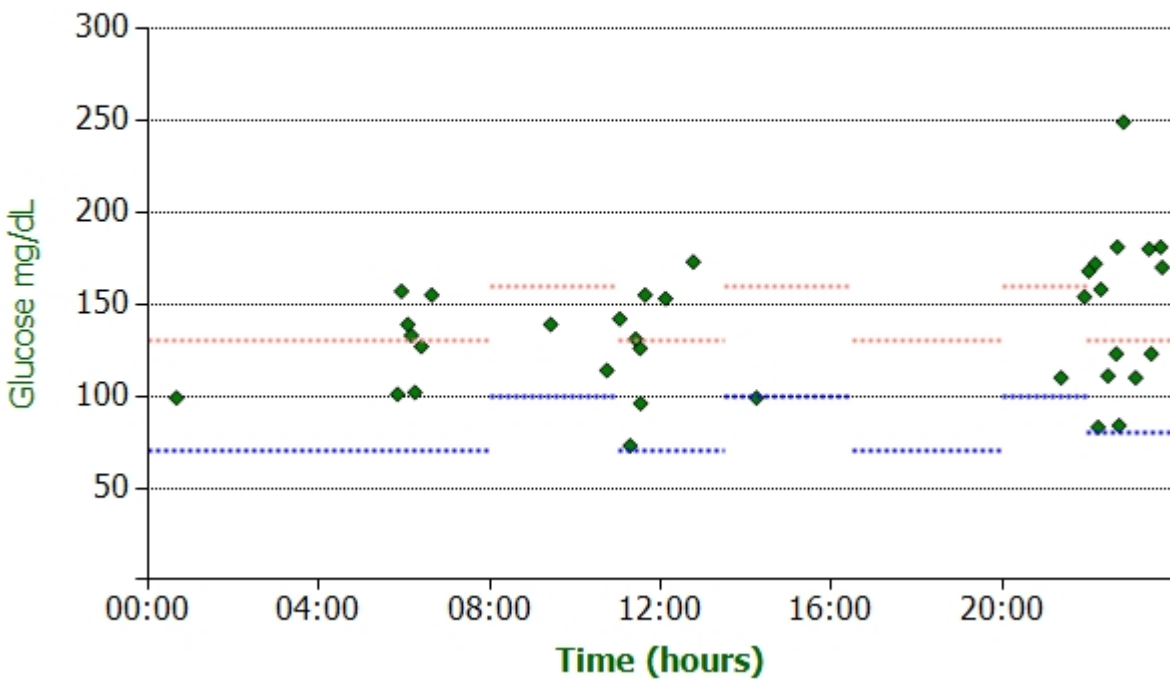

Raw readings for period: 10/04/2017 to 10/25/2017 (22 days)

Overnight

10/4/2017 6:38 AM 155 mg/dL  
10/11/2017 6:23 AM 127 mg/dL  
10/13/2017 6:09 AM 133 mg/dL  
10/16/2017 5:55 AM 157 mg/dL  
10/19/2017 12:39 AM 99 mg/dL  
10/20/2017 5:50 AM 101 mg/dL  
10/23/2017 6:14 AM 102 mg/dL  
10/25/2017 6:04 AM 139 mg/dL

After Breakfast

10/19/2017 9:25 AM 139 mg/dL  
10/24/2017 10:44 AM 114 mg/dL

Before Lunch

10/7/2017 11:30 AM 126 mg/dL  
10/8/2017 11:02 AM 142 mg/dL  
10/9/2017 11:24 AM 131 mg/dL  
10/12/2017 11:38 AM 155 mg/dL  
10/14/2017 12:45 PM 173 mg/dL  
10/17/2017 12:06 PM 153 mg/dL  
10/18/2017 11:31 AM 96 mg/dL  
10/21/2017 11:16 AM 73 mg/dL

After Lunch

10/5/2017 2:14 PM 99 mg/dL

After Dinner

10/4/2017 9:22 PM 110 mg/dL  
10/8/2017 9:55 PM 154 mg/dL

Before Bedtime

10/5/2017 10:50 PM 249 mg/dL  
10/7/2017 11:44 PM 170 mg/dL  
10/10/2017 11:42 PM 181 mg/dL  
10/11/2017 11:29 PM 123 mg/dL  
10/12/2017 10:18 PM 158 mg/dL  
10/13/2017 10:41 PM 181 mg/dL  
10/14/2017 10:28 PM 111 mg/dL  
10/15/2017 10:40 PM 123 mg/dL  
10/16/2017 10:44 PM 84 mg/dL

Patient: Patient: 7 ce8bbafe6ae04df1a7104b072c7767ee

Visit Date: 10/25/2017 14:21

10/17/2017 10:01 PM 168 mg/dL

10/19/2017 10:10 PM 172 mg/dL

10/21/2017 11:07 PM 110 mg/dL

10/22/2017 10:14 PM 83 mg/dL

10/24/2017 11:26 PM 180 mg/dL
